# Supplementary material for: Identifying Immune Cell Infiltration and Effective Diagnostic Biomarkers in Rheumatoid Arthritis by Bioinformatics Analysis
Source: Front Immunol. 2021 Aug 13;12:726747. doi: 10.3389/fimmu.2021.726747 (PMC8411707; doi:10.3389/fimmu.2021.726747)
Supplement: Supplementary file 4 [file Table_1.xls]

Name	pvalue	adj.P.Val	logFC
IGJ	7.81E-26	4.42E-24	4.687905912
MMP1	3.47E-14	1.69E-13	4.259192832
CXCL13	1.55E-23	5.05E-22	4.062647061
ADAMDEC1	1.83E-27	1.78E-25	3.991800174
CXCL9	4.72E-21	8.48E-20	3.195880384
IGHM	8.63E-26	4.73E-24	3.020198139
CCL18	2.69E-22	6.45E-21	3.006822267
CXCL10	5.04E-25	2.23E-23	2.972958216
IGLV1-44	1.07E-26	8.05E-25	2.854648926
IL7R	2.63E-23	8.02E-22	2.545417444
LRRC15	3.68E-30	6.61E-28	2.495331176
MMP3	3.28E-09	8.37E-09	2.459107765
CD52	1.47E-23	4.85E-22	2.425540882
TRBC1	6.83E-20	9.00E-19	2.323787386
IGKC	5.32E-26	3.22E-24	2.312451238
CCL19	5.15E-15	2.86E-14	2.310647711
CD247	6.20E-35	5.23E-32	2.293071802
SEL1L3	8.42E-29	1.06E-26	2.26740055
SDC1	2.65E-25	1.25E-23	2.265900527
MXRA5	1.31E-18	1.30E-17	2.188649853
CCL5	1.09E-25	5.83E-24	2.147330003
CD27	1.20E-26	8.88E-25	2.132366526
BLNK	3.78E-23	1.11E-21	2.096501698
TNFRSF17	7.29E-13	2.96E-12	2.074066784
CD3D	1.12E-22	2.94E-21	2.052311226
LAMP3	1.33E-14	6.95E-14	2.042003268
NKG7	1.35E-25	7.09E-24	2.01753893
GZMB	1.71E-21	3.37E-20	2.008938834
CEMIP	1.14E-20	1.84E-19	2.008613431
QPCT	6.01E-26	3.59E-24	1.991407824
CCR7	1.34E-21	2.71E-20	1.962451093
CYTIP	6.12E-20	8.18E-19	1.957412432
PNOC	2.87E-24	1.08E-22	1.894722239
PSMB9	8.39E-32	2.95E-29	1.889978794
SPP1	5.03E-09	1.26E-08	1.886895374
CORO1A	7.37E-20	9.59E-19	1.876170709
CD2	1.67E-19	1.97E-18	1.872189711
RASGRP1	1.45E-15	8.70E-15	1.864840137
AIM2	1.97E-20	3.04E-19	1.848334961
GZMH	2.22E-30	4.08E-28	1.813041264
MS4A1	1.95E-15	1.15E-14	1.795063747
HLA-DMB	3.38E-23	1.00E-21	1.787229956
LCK	2.41E-24	9.11E-23	1.784872857
IL2RG	7.36E-25	3.14E-23	1.766370485
IL32	6.07E-21	1.06E-19	1.765354932
HLA-DOB	1.98E-25	9.93E-24	1.757876336
S100A9	6.77E-12	2.40E-11	1.756534527
CD79A	4.72E-23	1.35E-21	1.745904294
CXCL6	4.15E-10	1.17E-09	1.743322659
ITK	4.79E-20	6.63E-19	1.742917186
GZMK	3.47E-14	1.69E-13	1.735550233
MMP9	8.85E-08	1.96E-07	1.731080411
TPD52	3.60E-20	5.15E-19	1.730158319
CD48	9.90E-21	1.63E-19	1.727590456
CRIP1	6.11E-15	3.34E-14	1.706985753
ISG20	8.40E-17	6.17E-16	1.67982622
RAC2	1.73E-25	8.97E-24	1.679616236
CCR5	1.95E-19	2.27E-18	1.651393141
SELL	4.87E-10	1.36E-09	1.647157903
CSF2RB	6.27E-22	1.37E-20	1.643966159
FAP	9.78E-16	6.06E-15	1.64148345
CHI3L2	1.25E-08	2.98E-08	1.63761977
XIST	3.34E-05	5.63E-05	1.633559824
BIRC3	1.64E-23	5.32E-22	1.62951073
PTPRC	5.10E-19	5.52E-18	1.62872619
LOXL1	3.57E-16	2.36E-15	1.614422703
PIM2	5.92E-23	1.63E-21	1.607062481
AQP9	3.16E-12	1.17E-11	1.599479039
RRM2	1.67E-14	8.62E-14	1.588876989
GZMA	7.68E-13	3.10E-12	1.565599088
GBP1	1.83E-17	1.51E-16	1.54155498
CXCR4	1.71E-17	1.41E-16	1.540292565
HLA-DPB1	7.10E-26	4.13E-24	1.530340796
TNFAIP6	9.18E-08	2.02E-07	1.516807109
ITGB2	3.97E-24	1.45E-22	1.516032712
VOPP1	9.54E-31	2.23E-28	1.513299686
FAIM3	2.52E-20	3.78E-19	1.510896903
CD8A	3.55E-20	5.09E-19	1.496338744
CD38	8.35E-17	6.15E-16	1.477204965
CXCL1	1.03E-06	2.04E-06	1.473173674
DLGAP5	6.84E-22	1.47E-20	1.461757996
UCP2	4.49E-27	3.87E-25	1.458036734
LCP1	7.65E-25	3.24E-23	1.451511315
OSBPL3	2.22E-26	1.49E-24	1.451231878
CDH11	2.59E-20	3.86E-19	1.450528893
EVI2B	5.14E-16	3.33E-15	1.445199213
CD14	2.20E-15	1.29E-14	1.444049795
STAT1	2.99E-28	3.40E-26	1.444041624
BCL2A1	7.61E-09	1.86E-08	1.436368425
RTN1	1.67E-21	3.30E-20	1.422243732
SMPDL3A	6.11E-19	6.50E-18	1.41553009
KCNN4	1.28E-26	9.36E-25	1.415328791
GPR65	5.87E-18	5.27E-17	1.41369094
KLRB1	1.82E-17	1.50E-16	1.411897222
HLA-DMA	3.82E-17	2.96E-16	1.411278115
P2RY6	1.16E-39	4.88E-36	1.406584638
CD86	6.16E-25	2.68E-23	1.394077741
FCGR2B	4.40E-13	1.84E-12	1.389791157
PRKCB	1.73E-19	2.04E-18	1.387107202
NMI	3.47E-21	6.43E-20	1.381801308
LILRB2	1.66E-20	2.57E-19	1.378560823
RARRES3	3.38E-16	2.25E-15	1.363337425
TNFSF10	2.89E-25	1.33E-23	1.359208934
IL10RA	4.28E-20	6.03E-19	1.355514431
PLXNC1	3.26E-22	7.62E-21	1.352457977
THY1	1.26E-13	5.68E-13	1.351789037
HLA-DRB4	1.41E-09	3.74E-09	1.344755958
BTN3A3	2.56E-20	3.83E-19	1.342360006
CTSH	1.98E-18	1.92E-17	1.335399646
LTB	2.59E-13	1.12E-12	1.328329924
CAPG	2.58E-13	1.11E-12	1.324948635
RHOH	4.87E-22	1.09E-20	1.322786714
CTSC	1.84E-22	4.55E-21	1.322590625
VAMP8	3.48E-14	1.70E-13	1.32127785
AOAH	1.73E-20	2.68E-19	1.318467291
NID2	6.39E-12	2.28E-11	1.315564718
PSMB10	3.13E-18	2.93E-17	1.30071715
CXCL11	6.74E-14	3.14E-13	1.297467631
GAP43	1.01E-24	4.23E-23	1.290135415
BTN3A2	1.34E-14	6.98E-14	1.289976114
TNFAIP8	3.17E-18	2.96E-17	1.274103101
LRMP	2.45E-19	2.78E-18	1.269865299
ADCY7	6.25E-19	6.63E-18	1.259971644
FPR3	1.56E-11	5.25E-11	1.247090346
CYFIP2	1.02E-26	7.86E-25	1.245165855
TNFSF11	4.58E-20	6.40E-19	1.2444502
GUSBP11	8.42E-33	3.74E-30	1.243498384
PSMB8	4.93E-23	1.39E-21	1.22695009
SEMA4D	9.87E-12	3.41E-11	1.218161319
TRAF3IP3	9.13E-25	3.85E-23	1.212037057
SLC39A8	2.07E-19	2.40E-18	1.208671994
TAP1	1.53E-22	3.79E-21	1.19630591
DOCK2	3.17E-23	9.52E-22	1.186476502
COL1A1	2.91E-09	7.48E-09	1.176482007
WISP1	2.42E-15	1.41E-14	1.160989259
CST7	8.94E-18	7.78E-17	1.157737161
CD72	2.08E-20	3.18E-19	1.156306265
EMR2	6.97E-13	2.83E-12	1.155813392
CD19	4.28E-15	2.39E-14	1.150406581
MMP13	1.21E-06	2.37E-06	1.1477275
GPR18	3.28E-09	8.36E-09	1.145225151
CD53	1.34E-20	2.13E-19	1.14323328
APOL1	7.29E-18	6.45E-17	1.134475418
PTPRCAP	3.19E-15	1.83E-14	1.13218079
CD37	2.59E-15	1.51E-14	1.131666417
LGALS2	2.17E-10	6.34E-10	1.130477218
APOBEC3G	3.11E-25	1.42E-23	1.127725768
APOBEC3B	6.06E-18	5.42E-17	1.113887174
GNLY	2.46E-25	1.18E-23	1.113499133
CCL13	5.33E-14	2.52E-13	1.110966912
RGS1	9.10E-10	2.47E-09	1.10573724
TOP2A	3.40E-19	3.77E-18	1.102240234
ITGA4	1.56E-18	1.53E-17	1.098190647
SLAMF1	5.54E-12	1.99E-11	1.097655301
KIAA0125	8.10E-15	4.36E-14	1.093758978
S100A8	3.57E-07	7.40E-07	1.093229673
SERPINA1	1.18E-12	4.61E-12	1.078426996
CCR2	8.97E-16	5.58E-15	1.076416528
HLA-DRB6	2.84E-35	2.99E-32	1.059383556
MAST1	9.45E-30	1.50E-27	1.055180649
MELK	7.16E-18	6.34E-17	1.053191977
NDC80	1.52E-16	1.07E-15	1.051690145
PPP1R16B	5.32E-19	5.71E-18	1.046908722
TRAT1	2.50E-16	1.70E-15	1.045729841
CRTAM	9.87E-17	7.17E-16	1.044659182
IGLV6-57	1.39E-26	9.87E-25	1.031745625
ARHGAP25	7.63E-20	9.91E-19	1.029654355
CYBA	2.16E-19	2.49E-18	1.029498019
HCP5	3.50E-17	2.73E-16	1.028929395
IGHD	1.08E-15	6.67E-15	1.02635451
SYK	6.20E-24	2.19E-22	1.024708218
ROR2	3.89E-20	5.54E-19	1.02154758
FCN1	3.70E-07	7.66E-07	1.020302954
ICAM3	1.54E-08	3.66E-08	1.016036275
PRKCZ	2.25E-21	4.36E-20	1.0152039
WNT5A	1.60E-11	5.38E-11	1.011628727
SDC3	1.27E-14	6.66E-14	1.009113483
ADAM28	7.61E-20	9.89E-19	1.007502553
ST8SIA4	9.41E-17	6.88E-16	1.000490378
TIMP4	2.89E-05	4.90E-05	-1.013490216
ABCA8	3.65E-07	7.56E-07	-1.058142326
MYOC	3.12E-06	5.87E-06	-1.130183625
ANGPTL7	1.87E-05	3.23E-05	-1.155431758
NR4A2	1.54E-06	2.98E-06	-1.164006101
SLC19A2	3.02E-08	6.97E-08	-1.173988438
EGR1	2.88E-08	6.66E-08	-1.215707753
NFIL3	1.38E-07	2.98E-07	-1.219623249
ADH1C	2.71E-09	6.98E-09	-1.298678945
LPL	7.92E-06	1.42E-05	-1.358970493
DDX3Y	1.35E-07	2.93E-07	-1.406183739
C6	8.00E-10	2.19E-09	-1.435689464
MAOA	1.59E-09	4.19E-09	-1.530456022
C7	1.27E-11	4.31E-11	-1.566643965
PLIN1	1.17E-05	2.05E-05	-1.625888916
RPS4Y1	0.000452821	0.000681859	-1.737737727
ZBTB16	4.01E-09	1.01E-08	-1.821387332
PCK1	2.00E-08	4.69E-08	-1.995850077
FOSB	3.87E-09	9.78E-09	-2.131453817
APOD	2.18E-11	7.18E-11	-2.186726908
ADH1B	1.41E-09	3.76E-09	-2.255282843
FABP4	5.47E-09	1.36E-08	-2.286129414
ADIPOQ	3.59E-08	8.23E-08	-2.574782548
